# Supplementary material for: NEDD9 Overexpression Causes Hyperproliferation of Luminal Cells and Cooperates with HER2 Oncogene in Tumor Initiation: A Novel Prognostic Marker in Breast Cancer
Source: Preprints.org preprint supplement (doi:10.20944/preprints202301.0005.v1), 2023-01-03
Supplement: Supplementary file 1 [file supplementary]

## Sheet: Sheet1
Age	Sex	Organ/Anatomic Site	Pathology diagnosis	TNM	Grade	Stage	Type	Tissue ID.	ER	PR	HER2	Ki67
42	F	Breast	Adjacent normal breast tissue	-	-	-	NAT	Fmg010004	N/A	N/A	0+	N/A
32	F	Breast	Adenosis of breast	-	-	-	AT	Fmg010008	N/A	N/A	0+	N/A
49	F	Breast	Cancer adjacent breast tissue	-	-	-	AT	Fmg010009	N/A	N/A	0+	N/A
45	F	Breast	Simple hyperplasia of duct epithelium（fibrous tissue）	-	-	-	Hyperplasia	Fmg010021	*	*	0+	-
27	F	Breast	Adenosis	-	-	-	Inflammation	Fmg010028	++	++	0+	+，8%
43	F	Breast	Adjacent normal breast tissue	-	-	-	NAT	Fmg010031	N/A	N/A	0+	N/A
44	F	Breast	Adenosis	-	-	-	Inflammation	Fmg010032	++	++	0+	-
19	F	Breast	Fibroadenoma	-	-	-	benign	Fmg010034	++	++	0+	+，1%
45	F	Breast	Invasive ductal carcinoma	T3N0M0	1	1	Malignant	Fmg010036	N/A	N/A	0+	N/A
23	F	Breast	Fibroadenoma	-	-	-	Benign	Fmg010045	+++	++	0+	+，1%
25	F	Breast	Fibroadenoma	-	-	-	Benign	Fmg010046	+++	++	0+	-
23	F	Breast	Fibroadenoma	-	-	-	Benign	Fmg010048	+++	++	0+	-
40	F	Breast	Adenosis of breast with epithelial proliferation of duct	-	-	-	AT	Fmg010051	N/A	N/A	0+	N/A
37	F	Breast	Ductal papillomatosis with hyperplasia	-	-	-	Hyperplasia	Fmg010052	++	+	0+	+，3%
42	F	Breast	Invasive ductal carcinoma	2	T2N0M0	2	Malignant	Fmg010053	N/A	N/A	0+	N/A
60	F	Breast	Invasive ductal carcinoma	2	T2N0M0	2	Malignant	Fmg010056	N/A	N/A	0+	N/A
49	F	Breast	Adjacent normal breast tissue	-	-	-	NAT	Fmg010065	N/A	N/A	0+	N/A
44	F	Breast	Adjacent normal breast tissue	-	-	-	NAT	Fmg010174	N/A	N/A	0+	N/A
58	F	Breast	Invasive ductal carcinoma	2	0M0 I期	2	Malignant	Fmg010272	N/A	N/A	0+	N/A
55	F	Breast	Plasma cell mastitis	-	-	-	Inflammation	Fmg010325	*	*	0+	-
62	F	Breast	Invasive carcinoma of no special type	T2N1M0	2	IIB	Malignant	Fmg010351	-	-	3+	+，1%
68	F	Breast	Adenosis of breast (sparse)	-	-	-	NAT	Fmg010407	N/A	N/A	0+	N/A
28	F	Breast	Invasive carcinoma of no special type	T1N0M0	3	IB	Malignant	Fmg010409	-	-	3+	+，5%
28	F	Breast	Invasive carcinoma of no special type	T1N0M0	3	IB	Malignant	Fmg010409	-	-	3+	+，5%
48	F	Breast	Mild atypical hyperplasia of duct	-	-	-	Hyperplasia	Fmg010508	+++	++	0+	-
48	F	Breast	Invasive carcinoma of no special type	T4N2M0	2	IIIB	Malignant	Fmg010531	++	+++	1+	+，3%
52	F	Lymph node	Metastatic carcinoma from breast	-	3	-	Metastasis	Fmg010536	+++	-	3+	+，3%
59	F	Lymph node	Metastatic carcinoma from breast	-	2	-	Metastasis	Fmg010537	+++	+	3+	+，20%
	F	Breast	Invasive ductal carcinoma	-	-	-	Malignant	Fmg010545	N/A	N/A	2+	N/A
	F	Breast	Invasive ductal carcinoma	-	-	-	Malignant	Fmg010550	N/A	N/A	2+	N/A
53	F	Breast	Invasive carcinoma of no special type	T2N0M0	2	IIA	Malignant	Fmg010551	-	-	3+	+，20%
60	F	Lymph node	Metastatic carcinoma from breast	-	2	-	Metastasis	Fmg010607	-	-	3+	+，65%
28	F	Lymph node	Metastatic carcinoma from breast	-	2	-	Metastasis	Fmg010628	-	-	3+	+，30%
50	F	Breast	Invasive carcinoma of no special type	T2N2M0	2	IIIA	Malignant	Fmg010629	-	-	3+	-
54	F	Breast	Invasive carcinoma of no special type	T2N0M0	1	IIA	Malignant	Fmg010637	+++	++	1+	+，1%
43	F	Breast	Adjacent normal breast tissue (sparse)	-	-	-	NAT	Fmg010690	N/A	N/A	0+	N/A
55	F	Breast	Invasive carcinoma of no special type	T2N0M0	2	IIA	Malignant	Fmg010717	+++	+	1+	+，15%
29	F	Breast	Invasive carcinoma of no special type	T2N0M0	2	IIA	Malignant	Fmg010729	-	-	3+	+，5%
55	F	Breast	Invasive carcinoma of no special type	T2N0M0	3	IIA	Malignant	Fmg010730	-	-	1+	+，75%
32	F	Breast	Invasive carcinoma of no special type	T2N0M0	2	IIA	Malignant	Fmg010731	+++	+++	2+	+，5%
62	F	Breast	Invasive carcinoma of no special type	T2N0M0	3	IIA	Malignant	Fmg010732	-	-	1+	+，30%
44	F	Breast	Invasive carcinoma of no special type	T1N0M0	2	IA	Malignant	Fmg010733	+++	+++	1+	+，3%
68	F	Breast	Invasive carcinoma of no special type	T2N0M0	2	IIA	Malignant	Fmg010735	+++	+++	1+	+，3%
63	F	Breast	Invasive carcinoma of no special type	T2N0M0	3	IIA	Malignant	Fmg010757	+++	++	2+	+，30%
38	F	Breast	Invasive carcinoma of no special type	T2N1M0	2	IIB	Malignant	Fmg010758	-	-	3+	+，5%
45	F	Breast	Invasive carcinoma of no special type	T2N0M0	1	IIA	Malignant	Fmg010760	+++	+++	1+	+，30%
46	F	Breast	Invasive carcinoma of no special type	T2N0M0	2	IIA	Malignant	Fmg010769	+	-	3+	+，15%
50	F	Breast	Invasive ductal carcinoma	2	-	2	Malignant	Fmg010774	N/A	N/A	1+	N/A
35	F	Breast	Adjacent normal breast tissue	-	-	-	NAT	Fmg010800	+	+	0+	-
	F	Breast	Invasive ductal carcinoma	-	-	-	Malignant	Fmg010803	N/A	N/A	3+	N/A
43	F	Breast	Invasive carcinoma of no special type	T2N0M0	2	IIA	Malignant	Fmg010835	+++	+++	1+	+，5%
68	F	Breast	Invasive ductal carcinoma	2	T4N2M1	2	Malignant	Fmg010845	N/A	N/A	0+	N/A
44	F	Breast	Invasive carcinoma of no special type	T2N0M0	1	IIA	Malignant	Fmg010859	+++	+++	1+	+，10%
	F	Breast	Invasive ductal carcinoma	-	-	-	Malignant	Fmg010905	N/A	N/A	3+	N/A
55	F	Breast	Invasive carcinoma of no special type	T4N0M0	2	IIIB	Malignant	Fmg010908	++	-	3+	+，5%
50	F	Breast	Invasive carcinoma of no special type	T4N0M0	2	IIIB	Malignant	Fmg010912	+++	+++	1+	+，5%
32	F	Breast	Cancer adjacent breast tissue	-	-	-	AT	Fmg010914	N/A	N/A	3+	N/A
53	F	Breast	Cancer adjacent breast tissue	-	-	-	AT	Fmg010925	N/A	N/A	0+	N/A
47	F	Breast	Squamous cell carcinoma	T1N0M0	3	IA	Malignant	Fmg010930	-	-	3+	+，5%
80	F	Lymph node	Metastatic carcinoma from breast	-	2	-	Metastasis	Fmg010939	++	-	3+	+，3%
59	F	Breast	Invasive lobular carcinoma	T4N0M0	-	IIIB	Malignant	Fmg020022	+++	+++	2+	+，5%
65	F	Breast	Invasive carcinoma of no special type	T2N0M0	1	IIA	Malignant	Fmg020082	+++	+++	3+	+，3%
35	F	Breast	Adenosis of breast	-	-	-	NAT	Fmg020086	N/A	N/A	0+	N/A
54	F	Breast	Invasive carcinoma of no special type	T1N0M0	2	IA	Malignant	Fmg020088	+++	++	3+	+，15%
35	F	Breast	Invasive carcinoma of no special type	T1N0M0	2	IA	Malignant	Fmg020094	++	++	3+	+，20%
71	F	Breast	Invasive carcinoma of no special type	T2N2M0	3	IIIA	Malignant	Fmg020095	+++	++	2+	+，5%
53	F	Lymph node	Metastatic carcinoma from breast	-	2	-	Metastasis	Fmg020153	-	-	3+	+，10%
35	F	Breast	Adjacent normal breast tissue	-	-	-	NAT	Fmg020360	N/A	N/A	3+	N/A
56	F	Lymph node	Metastatic carcinoma from breast	-	2	-	Metastasis	Fmg020431	-	-	3+	+，5%
40	F	Lymph node	Metastatic carcinoma from breast	-	2	-	Metastasis	Fmg020433	-	-	3+	+，10%
49	F	Lymph node	Metastatic carcinoma from breast	-	3	-	Metastasis	Fmg020530	-	-	3+	+，3%
66	F	Lymph node	Metastatic carcinoma from breast	-	*	-	Metastasis	Fmg020534	++	+	3+	+，15%
42	F	Lymph node	Metastatic carcinoma from breast (sparse)	-	-	-	Metastasis	Fmg020539	-	-	3+	+，5%
52	F	Breast	Invasive ductal carcinoma	-	2	-	Metastasis	Fmg020652	+++	+	3+	+，15%
52	F	Lymph node	Metastatic carcinoma from breast of No.44	-	2	-	Metastasis	Fmg020652	+++	+	3+	+，15%
47	F	Breast	Invasive ductal carcinoma	2	T1N0M0	2	Malignant	Fmg020678	N/A	N/A	3+	N/A
-	F	Breast	Invasive ductal carcinoma	-	-	-	Malignant	Fmg020851	N/A	N/A	2+	N/A
69	F	Breast	Invasive lobular carcinoma	T2N0M0	-	IIA	Malignant	Fmg020930	+	-	1+	-
70	F	Breast	Invasive lobular carcinoma	T4N0M0	-	IIIB	Malignant	Fmg020931	++	-	1+	-
53	F	Breast	Cancer adjacent breast tissue	-	-	-	AT	Fmg021211	N/A	N/A	0+	N/A
39	F	Breast	Adjacent normal breast tissue	-	-	-	NAT	Fmg021339	N/A	N/A	0+	N/A
48	F	Breast	Squamous cell carcinoma	T4N0M0	1	IIIB	Malignant	Fmg021481	-	-	2+	+，15%
49	F	Breast	Cancer adjacent breast tissue	-	-	-	AT	Fmg030695	N/A	N/A	0+	N/A
43	F	Breast	Adenosis of breast	-	-	-	NAT	Fmg030946	N/A	N/A	0+	N/A
39	F	Breast	Ductal carcinoma in situ	TisN0M0	-	0	Malignant	Fmg030989	-	-	3+	+，10%
39	F	Breast	Cancer adjacent breast tissue	-	-	-	AT	Fmg031198	N/A	N/A	0+	N/A
59	F	Breast	Invasive ductal carcinoma	1	T2N2M0	1	Malignant	Fmg031230	N/A	N/A	0+	N/A
43	F	Breast	Adjacent normal breast tissue	-	-	-	NAT	Fmg031231	N/A	N/A	0+	N/A
64	F	Breast	Adjacent normal breast tissue	-	-	-	NAT	Fmg031337	N/A	N/A	0+	N/A
46	F	Breast	Plasma cell mastitis	-	-	-	Inflammation	Fmg031363	+	+	0+	-
48	F	Breast	Invasive ductal carcinoma	2	T3N0M0	2	Malignant	Fmg031422	N/A	N/A	0+	N/A
69	F	Breast	Invasive ductal carcinoma	2	T3N0M0	2	Malignant	Fmg031603	N/A	N/A	0+	N/A
50	F	Breast	Adjacent normal breast tissue	-	-	-	NAT	Fmg032170	N/A	N/A	0+	N/A
44	F	Breast	Chronic mastitis	-	-	-	Inflammation	Fmg040540	+	+	0+	-
30	F	Breast	Cancer adjacent breast tissue	-	-	-	AT	Fmg040973	N/A	N/A	0+	N/A
36	F	Breast	Cancer adjacent breast tissue	-	-	-	AT	Fmg050306	N/A	N/A	0+	N/A
57	F	Breast	Invasive ductal carcinoma	2	T3N0M0	2	Malignant	Fmg050539	N/A	N/A	0+	N/A
51	F	Breast	Invasive ductal carcinoma	2	T3N0M0	2	Malignant	Fmg050548	N/A	N/A	0+	N/A
44	F	Breast	Invasive ductal carcinoma	1	T2N0M0	1	Malignant	Fmg050550	N/A	N/A	0+	N/A
40	F	Breast	Mild atypical hyperplasia of duct	-	-	-	Hyperplasia	Fmg060063	+++	+++	0+	+，1%
39	F	Breast	Adenosis of breast	-	-	-	AT	Fmg060329	N/A	N/A	0+	N/A
48	F	Breast	Adjacent normal breast tissue	-	-	-	NAT	Fmg060540	N/A	N/A	0+	N/A
38	F	Breast	Invasive ductal carcinoma	2	T3N0M0	2	Malignant	Fmg06N002	N/A	N/A	0+	N/A
44	F	Breast	Adenosis of breast	-	-	-	AT	Fmg06N023	N/A	N/A	0+	N/A
45	F	Breast	Adjacent normal breast ductal hyperplasia tissue	-	-	-	NAT	Fmg06N024	N/A	N/A	0+	N/A
61	F	Breast	Invasive ductal carcinoma with necrosis (sparse)	2	T2N2M0	2	Malignant	Fmg07N011	N/A	N/A	0+	N/A
40	F	Breast	Cancer adjacent breast tissue (sparse)	-	-	-	AT	Fmg07N013	N/A	N/A	0+	N/A
35	F	Breast	Adjacent normal breast tissue	-	-	-	NAT	Fmg07N025	N/A	N/A	0+	N/A
-	F	Breast	Adjacent normal breast tissue	-	-	-	NAT	Fmg010026	N/A	N/A	0+	N/A
